# Supplementary material for: The synthesis and self-assembly of bioconjugates composed of thermally-responsive polymer chains and pendant lysozyme molecules
Source: Royal Society of Chemistry journal article supplement (doi:10.1039/c7py00315c), 2017-01-01
Supplement: c7py00315c1.pdf [file c7py00315c1.pdf]

## Supporting Information

### Synthesis and self-assembly of bioconjugates composed of thermal-responsive polymer chains and pendant lysozyme molecules

Xiaotian Ji, Li Liu and Hanying Zhao

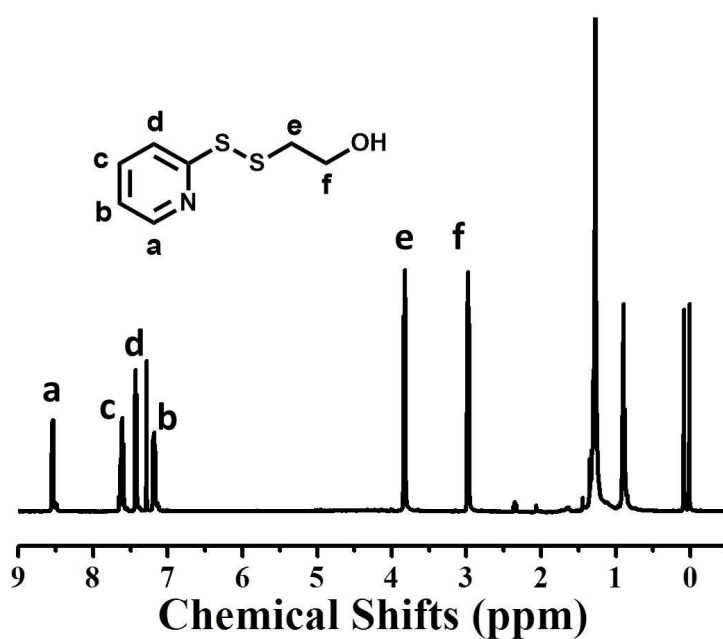

Fig. S1 <sup>1</sup>H NMR spectrum of 2-(pyridine-2-yl)disulfanyl ethanol in CDCl<sub>3</sub>.

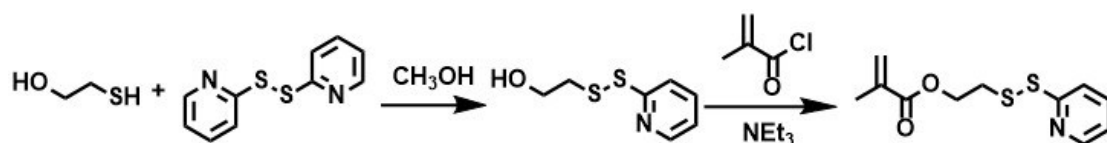

Fig. S2 Scheme for the synthesis of 2-(pyridine-2-yl) ethyl methacrylate (PDSMA).

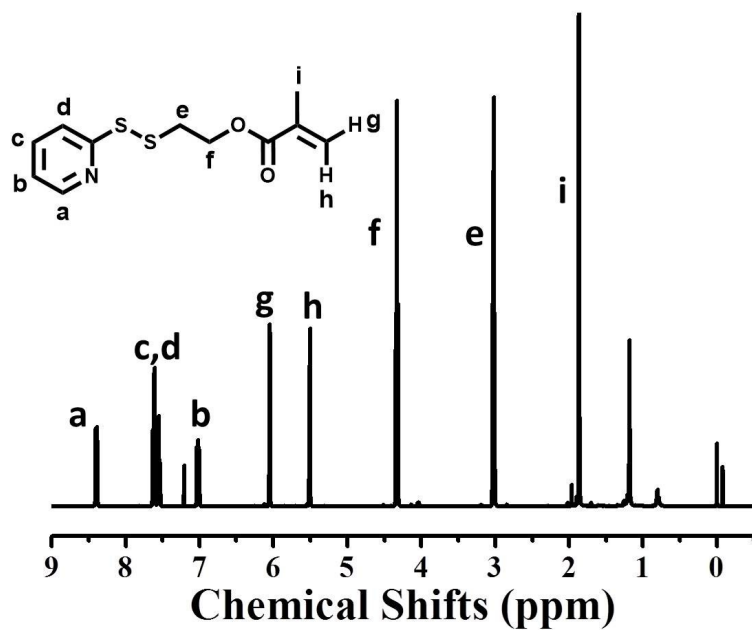

**Fig. S3**  $^1\text{H}$  NMR spectrum of 2-(pyridine-2-yl)disulfanyl ethyl methacrylate (PDSMA) in  $\text{CDCl}_3$ .

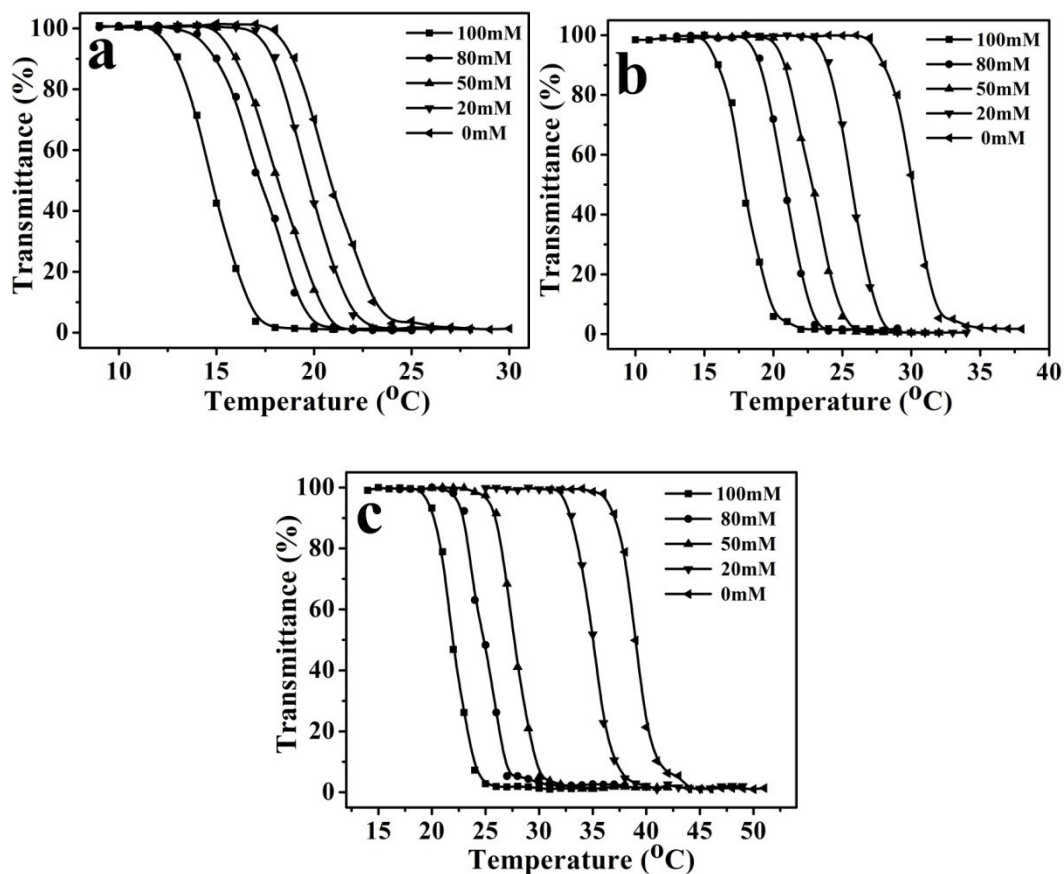

**Fig. S4** (a) Plots of transmittances of poly(DEGMA<sub>250</sub>-co-PDSMA<sub>12</sub>) copolymer vs temperatures at different PBS concentrations, (b) Plots of transmittances of G-1 vs temperatures at different PBS concentrations, (c) Plots of transmittances of G-2 vs temperatures at different PBS concentrations.

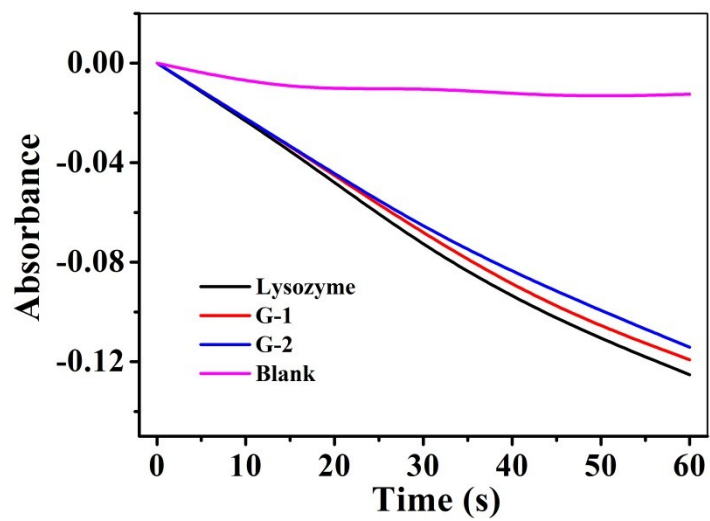

**Fig. S5** Plots of absorbances of the solutions at 450 nm versus reaction time at 25 °C.
